# Supplementary material for: Y-chromosomal analysis of clan structure of Kalmyks, the only European Mongol people, and their relationship to Oirat-Mongols of Inner Asia
Source: PubMed Central journal article supplement (PMC6777519; doi:10.1038/s41431-019-0399-0), 2019-04-11

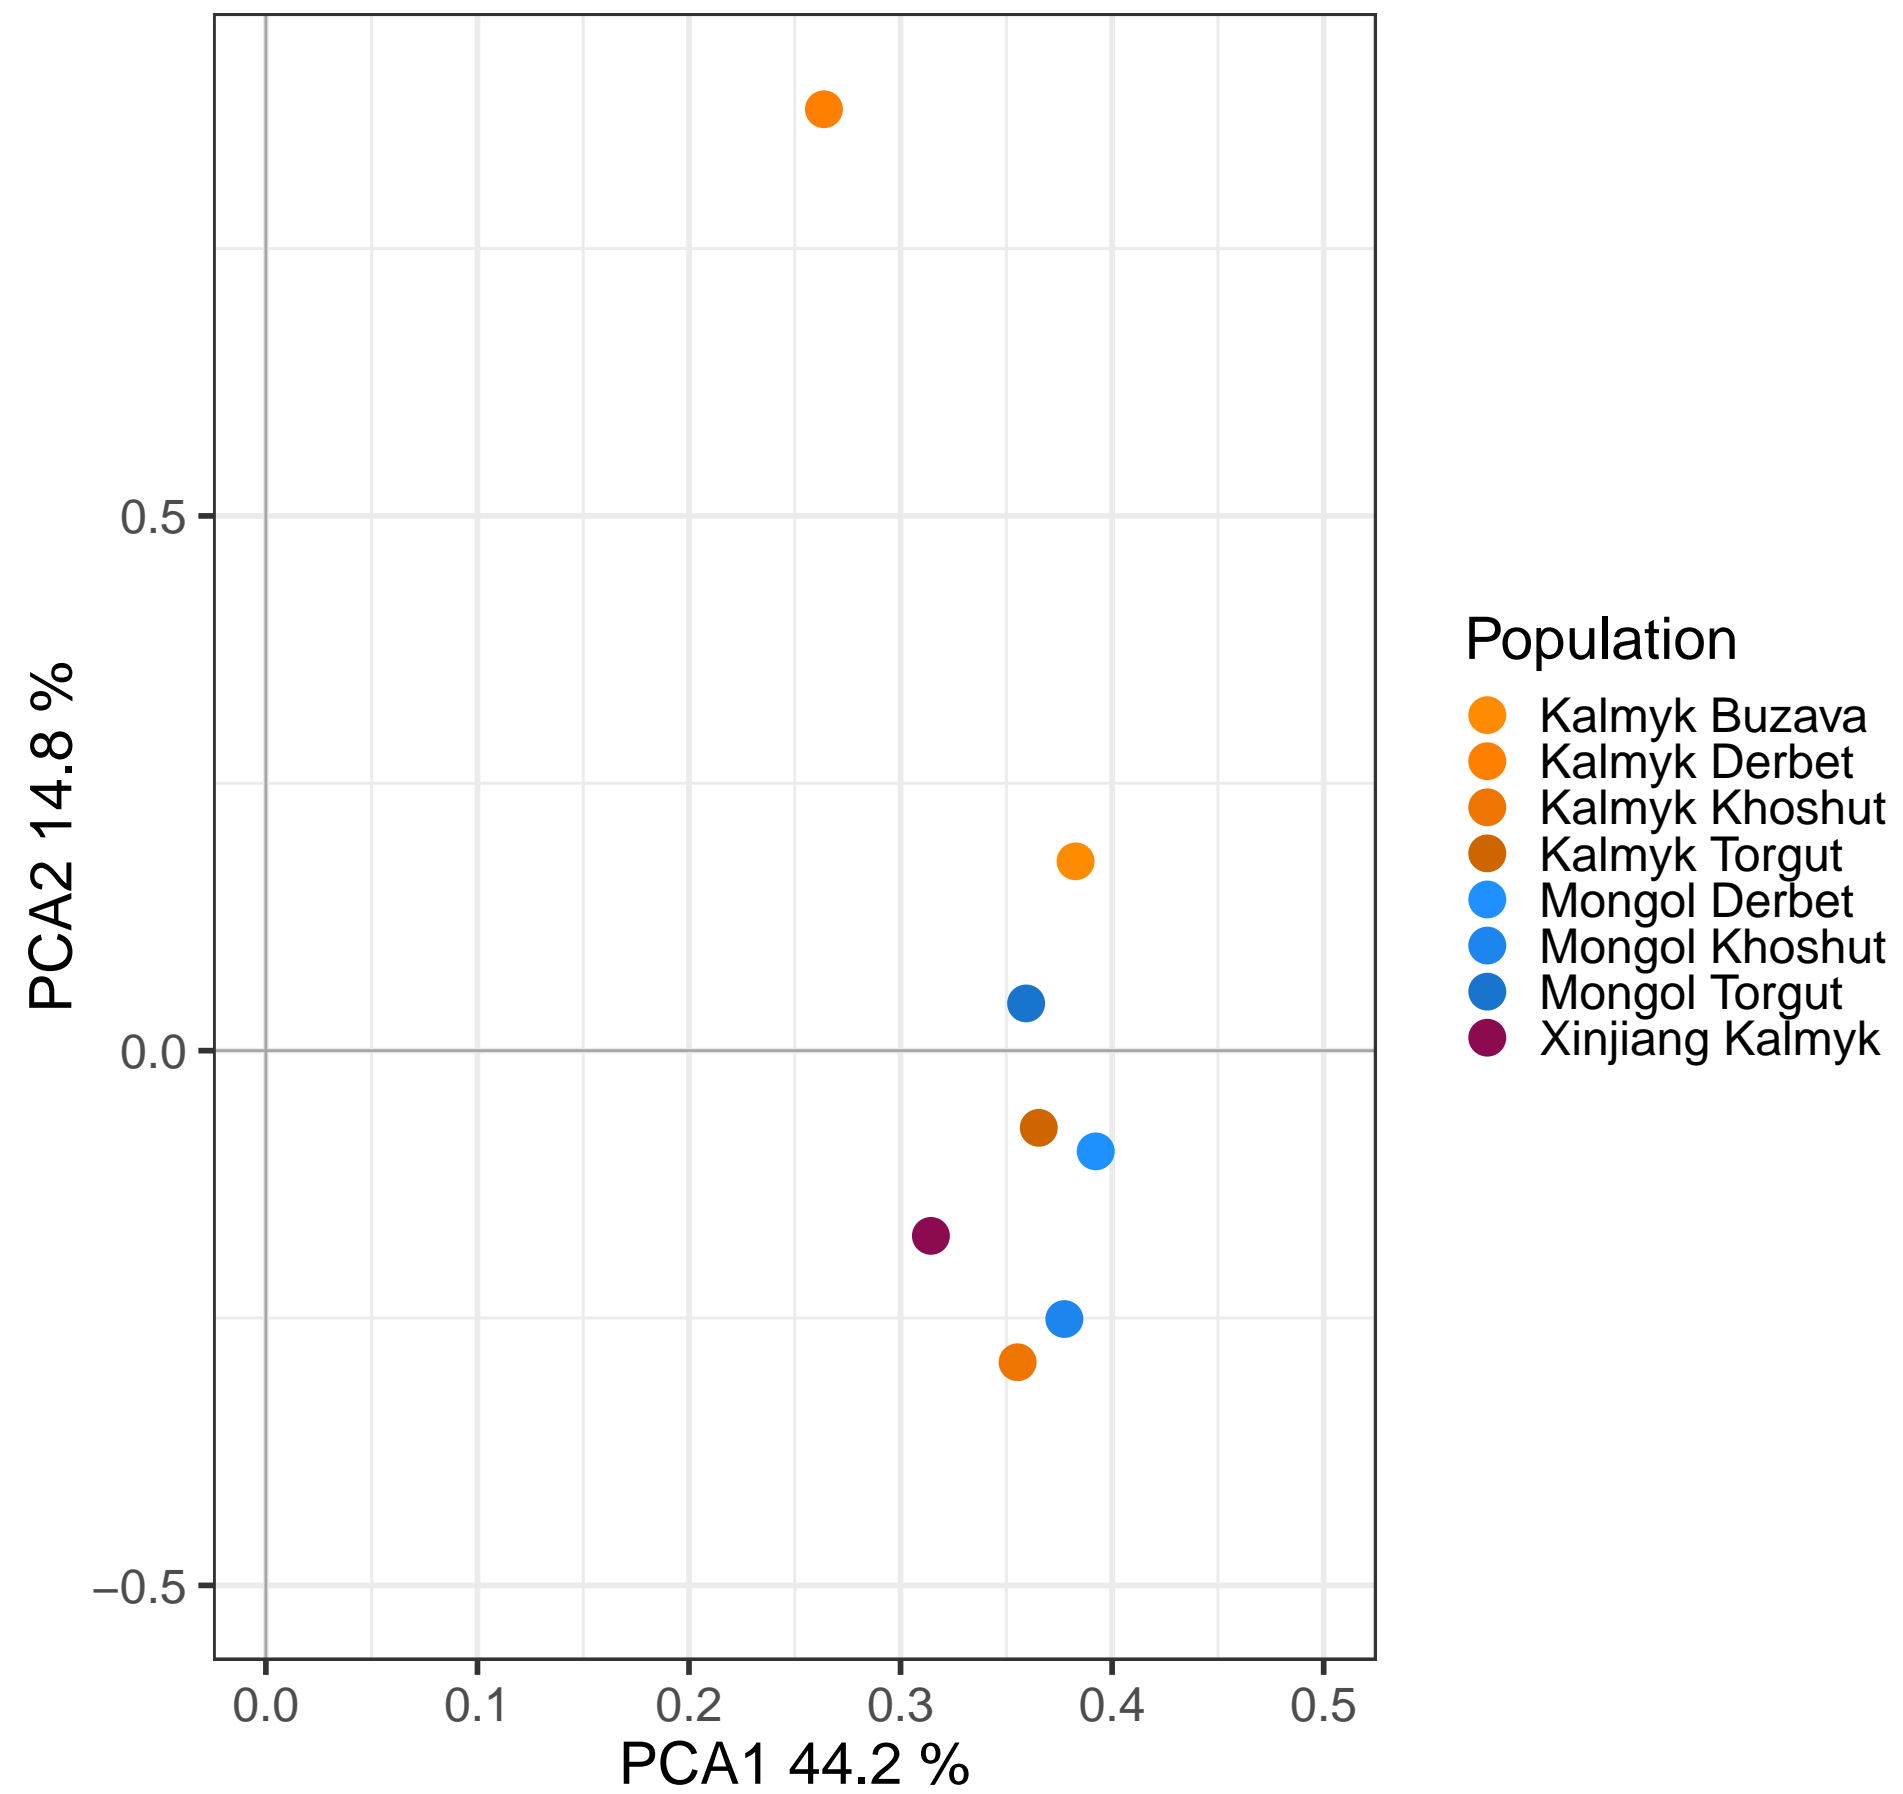

Supplement: 41431_2019_399_MOESM2_ESM.pdf [file 41431_2019_399_MOESM2_ESM.pdf]
